April 16, 2021

## **Evolutionary dynamics of asexual hypermutators adapting to a novel environment**

Wei-Chin Ho<sup>1\*</sup>, Megan G. Behringer<sup>1,2,3</sup>, Samuel F. Miller<sup>1</sup>, Jadon Gonzales<sup>1</sup>, Amber Nguyen<sup>1</sup>, Meriem Allahwerdy<sup>1</sup>, Gwyneth F. Boyer<sup>1</sup>, Michael Lynch<sup>1\*</sup>

<sup>1</sup>Center for Mechanisms of Evolution, The Biodesign Institute, Arizona State University, Tempe, AZ 85287.

<sup>2</sup>Department of Biological Sciences, Vanderbilt University, Nashville, TN 37232.

<sup>3</sup>Department of Pathology, Microbiology, and Immunology, Vanderbilt University Medical Center, Nashville, TN 37232.

\*Authors for Correspondence:

Wei-Chin Ho  
Center for Mechanisms of Evolution,  
The Biodesign Institute,  
Arizona State University,  
Tempe, AZ 85287.  
Phone: 480-727-8005  
Email: [weichinh@asu.edu](mailto:weichinh@asu.edu)

Michael Lynch  
Center for Mechanisms of Evolution,  
The Biodesign Institute,  
Arizona State University,  
Tempe, AZ 85287.  
Phone: 480-965-0868  
Email: [mlynch11@asu.edu](mailto:mlynch11@asu.edu)

1 **Abstract**

2 How microbes adapt to a novel environment is a central question in evolutionary biology. While  
3 adaptive evolution must be fueled by beneficial mutations, whether higher mutation rates facilitate  
4 the rate of adaptive evolution remains unclear. To address this question, we cultured *Escherichia*  
5 *coli* hypermutating populations, in which a defective methyl-directed mismatch repair pathway  
6 causes a 140-fold increase in single-nucleotide mutation rates. In parallel with wild-type *E. coli*,  
7 populations were cultured in tubes containing Luria-Bertani broth, a complex medium known to  
8 promote the evolution of subpopulation structure. After 900 days of evolution, in three transfer  
9 schemes with different population-size bottlenecks, hypermutators always exhibited similar levels  
10 of improved fitness as controls. Fluctuation tests revealed that the mutation rates of hypermutator  
11 lines converged evolutionarily on those of wild-type populations, which may have contributed to  
12 the absence of fitness differences. Further genome-sequence analysis revealed that, although  
13 hypermutator populations have higher rates of genomic evolution, this largely reflects the effects  
14 of genetic draft under strong linkage. Despite these linkage effects, the evolved populations exhibit  
15 parallelism in fixed mutations, including those potentially related to biofilm formation,  
16 transcription regulation, and mutation-rate evolution. Together, these results generally negate the  
17 presumed relationship between high mutation rates and high adaptive speed of evolution,  
18 providing insight into how clonal adaptation occurs in novel environments.

19 **Key words:** adaptation; bottleneck effects; drift barrier; *Escherichia coli*; mutational load;  
20 mutation rate.

## 21 **Significance statement**

22 While mutations are critical source for the adaptation in a new environment, whether or not the  
23 elevated mutation rates can empirically lead to the elevated adaptation rates remains unclear,  
24 especially when the environment is more heterogenous. To answer this question, we evolved *E.*  
25 *coli* populations with different starting mutation rates in a complex medium for 900 days and  
26 then examined their fitness and genome profiles. In the populations that have a higher starting  
27 mutation rate, despite faster genome evolution, their fitness improvement is not significantly  
28 faster. Our results reveal that the effect of elevated mutation rates is only very limited, and the  
29 mutations accumulated in hypermutators are largely due to linkage effect.

## 30 **Introduction**

31 Beneficial mutations are the ultimate source of adaptive evolution. Therefore, it is of  
32 interest to study how changes to mutational processes can influence an adaptive process. In terms  
33 of mutation rates, a theoretically complicated relationship with the rate of adaptation in asexual  
34 populations was proposed in the early studies on the evolution of sex (Muller 1932; Crow and  
35 Kimura 1965). These studies posit that, when mutation rates are low, such that the waiting time  
36 for a beneficial mutation to arise in a population remains long, increases in the mutation rate can  
37 result in linear increases in the adaptation rate. In contrast, when mutation rates are relatively high,  
38 such that multiple beneficial mutations frequently arise in different individuals within a population,  
39 beneficial mutations may interfere with each other's opportunity to spread through the entire  
40 population. Thus, the facilitation effect of the mutation rate on the adaptation rate becomes  
41 diminished, a phenomenon later called clonal interference (Gerrish and Lenski 1998). More recent  
42 theoretical studies have suggested that the effective number of beneficial mutations per population  
43 is critical for the strength of clonal interference, and effective population sizes and effect-size  
44 distributions of mutations have also been proposed to be influential (Gerrish and Lenski 1998;  
45 Wilke 2004; Kim and Orr 2005; Bollback and Huelsenbeck 2007; Desai and Fisher 2007; Park  
46 and Krug 2007; Campos and Wahl 2010; Park et al. 2010; Good et al. 2012; Penisson et al. 2017).

47 The relationship between mutation rates and rates of adaptation is further complicated  
48 because mutation rates can be plastically different in various environments (Williams and Foster  
49 2012; Long et al. 2016; Shewaramani et al. 2017) and evolve over time (Wielgoss et al. 2013;  
50 Swings et al. 2017). Given that most mutations are deleterious, high mutation rates create high  
51 mutational loads in the genome, potentially driving the spread of antimutator alleles and resulting  
52 in the evolution of lower mutation rates (Muller 1950; Kimura 1967; Lynch 2008). According to

53 the drift-barrier hypothesis, the reduction of the mutation rate should continue until the addition of  
54 new antimutator alleles no longer contributes to a significant enough reduction in mutational load  
55 to overcome genetic drift (Lynch 2010b; Sung et al. 2012; Lynch et al. 2016). Consequently, if  
56 two populations with initially different mutation rates adapt to the same constant environment, the  
57 resulting difference in fitness-improvement rates can be less than predicted if both populations  
58 converge evolutionarily to similar mutation rates.

59 While ample theoretical discussion exists on the relationship between mutation rates and  
60 the rate of adaptation, the theory has been mostly focused on constant environments with a simple  
61 fitness landscape, neglecting the likely complexity of more natural environments. The limited  
62 empirical evidence in asexual populations suggests that adaptation rates are a concave-down  
63 function of the mutation rate (Arjan et al. 1999; Desai et al. 2007; Sprouffske et al. 2018). However,  
64 the experimental environments in these studies were generally simple and homogeneous (Arjan et  
65 al. 1999; Desai et al. 2007; Sprouffske et al. 2018), or the populations of interest were already  
66 well-adapted to the experimental environment (McDonald et al. 2012). How the relationship  
67 between mutation rates and adaptation rates evolves when the environmental setting becomes more  
68 complex and heterogeneous is less understood. For example, the modes of adaptation in complex  
69 environments may vary greatly due to the presence of a more rugged fitness landscape, additional  
70 paths available for fitness improvement, the presence of multiple spatial or nutritional niches, or  
71 more complicated genetic interactions. (Handel and Rozen 2009; Lynch 2010a; Ochs and Desai  
72 2015; Guo et al. 2019). Therefore, it is necessary to study adaptive processes in more complex and  
73 heterogeneous environments to determine whether the principles observed in simpler  
74 environments still apply.

75 To study how the mutation rate affects adaptation in a more complex setting, we performed  
76 long-term experimental evolution of *Escherichia coli* in culture tubes containing a complex  
77 medium, Luria-Bertani (LB) broth, which is comprised of a nutritionally-rich mixture of multiple  
78 amino-acid based carbon sources (Sezonov et al. 2007). In contrast to evolution in flasks  
79 containing glucose-limited media, such environments can facilitate the rapid emergence of stable  
80 subpopulations and clonal divergence based on spatial niche differentiation and amino-acid  
81 metabolism divergence (Behringer et al. 2018). To vary the mutation rate, we evolved both WT  
82 populations (MMR+) and hypermutator populations with an impaired methyl-directed mismatch  
83 repair pathway (MMR-, obtained by *mutL* knockout), for which the single-nucleotide mutation  
84 rate is 140-fold higher than that for the WT genetic background (Lee et al. 2012). Because the  
85 results of experimental evolution may be altered by different demographic settings (Vogwill et al.  
86 2016; Wein and Dagan 2019), replicated populations were assigned to one of three different daily-  
87 transfer size treatments: 1/10 (large, L), 1/10<sup>4</sup> (medium, M), and 1/10<sup>7</sup> (small, S) dilutions into  
88 fresh media. Here, we examined the differences in phenotypic and molecular evolution among  
89 these populations over the course of 900 days.

90

## 91 **Results**

92 **Higher initial mutation rates do not translate into faster rates of fitness improvement.** When  
93 batch cultured, *E. coli* commonly adapt to their experimental environments and show fitness  
94 improvement compared to their ancestors (Van den Bergh et al. 2018; McDonald 2019). To  
95 compare adaptation rates in populations originating from genetic backgrounds with different initial  
96 mutation rates (MMR- and WT), we performed head-to-head competition assays between  
97 populations that had evolved for 900 days and their corresponding ancestor. For each of six

98 genetic-background/transfer-size combinations ( $2 \times 3$ ), four replicated populations were measured.  
99 Across all 21 populations with data available (three were aborted; see Materials and Methods),  
100 mean fitness significantly increased relative to the time-zero ancestor, by a ratio of 1.14 (SE =  
101 0.019;  $P = 5.8 \times 10^{-7}$ , two-tailed  $t$ -test), indicating the evolution of these populations shaped by  
102 adaptive processes.

103 The amount of fitness improvement of MMR- populations was not significantly different  
104 from that for WT populations among any of the transfer sizes (**Fig. 1A**; L:  $P = 0.26$ ; M:  $P = 0.46$ ;  
105 S:  $P = 0.15$ , nested ANOVA). In particular, considering the ratio of mean fitness improvement  
106 (MMR- : WT), no transfer size produced a ratio significantly different from 1.0. For example, for  
107 the L transfer size, the mean fitness improvement for MMR- and WT backgrounds are respectively  
108 0.27 (SE = 0.043) and 0.21 (SE = 0.047), and therefore the ratio (MMR-: WT) is 1.28 (SE = 0.35).  
109 Similarly, in the M and S transfer sizes, the ratios are 0.69 (SE = 0.28) and 2.76 (SE = 1.98),  
110 respectively. Thus, starting evolution as a hypermutator does not necessarily translate into a faster  
111 fitness-improvement rate.

112 Previous studies of *E. coli* in simpler, more homogeneous environments have shown that  
113 the most rapid increases in population fitness typically occur within 2500 generations, after which  
114 the rate of adaptation significantly slows (Barrick et al. 2009). At 900 days, the L populations,  
115 which due to their large transfer size experienced the least number of cell divisions, had  
116 experienced ~3000 generations, whereas the S populations had experienced ~21,000 generations.  
117 As such, the absence of significant differences in the cumulative amount of adaptation over this  
118 period – despite large differences in initial mutation rate – might be a consequence of both genetic  
119 backgrounds having exited an initial period of rapid fitness evolution. Thus, to better survey any  
120 temporal heterogeneity in the rate of adaptation, we further assessed fitness after 90-, 300-, and

121 600-days of evolution in response to L and S transfer sizes. The results of nested ANOVA again  
122 demonstrate a lack of evidence for an increase in initial mutation rates leading to an increase in  
123 the amount of fitness improvement (**Fig. 1B-D**). The results are not qualitatively changed even  
124 when the natural-logarithmic transformed fitness is used in the analysis (**Fig. S1**). Thus, high  
125 mutation rates did not result in accelerated fitness improvement in these asexual populations even  
126 in the early stages of adaptation.

127

128 **Mutation rates evolve to be more similar throughout experimental evolution.** The indifference  
129 of adaptation rates to initial mutation rates might be explained if the mutation rates of hypermutator  
130 and WT populations became more similar during the evolution experiment, either due to a  
131 reduction in the mutation rate in initially hypermutating populations or to an increase of the rate  
132 in WT populations. To test this possibility, we performed fluctuation tests, which indirectly  
133 measure mutation rates at a resistance locus (Foster 2006), on different clones isolated from  
134 evolved populations after 900 days. Although the ratio of rifampicin-resistance mutation rates for  
135 the two ancestral lines (MMR- : WT) was 250 (**Fig. S2**), after 900 days of evolution, the mean  
136 difference in mutation rates between MMR- and WT backgrounds greatly decreased across all  
137 transfer sizes (**Fig. 2**). For example, in the L transfer size, the mean mutation rate is  $5.0 \times 10^{-7}$  (SE  
138 =  $2.7 \times 10^{-7}$ ) and  $1.6 \times 10^{-8}$  (SE =  $1.2 \times 10^{-8}$ ) for MMR- and WT evolved populations, respectively.  
139 Therefore, the ratio of mean mutation rates (MMR- : WT) was reduced to 32 (SE = 29). This  
140 reduction, however, seems mostly attributed to the occasional emergence of higher mutation rates  
141 in the WT background as only one population (115) among four tested WT, L populations shows  
142 a significant increase of the mutation rate in both tested clones. In the M and S transfer size, the  
143 ratio of mean mutation rates (MMR- : WT) was also reduced to 32 (SE = 15) and 12 (SE = 3.9),



144 respectively. However, the repeated evolution of lower mutation rates in clones isolated from  
145 MMR- background plays a more important role in the reduction as all of the tested clones from  
146 MMR-, M or S populations show a significant decrease of the mutation rate. Thus, the evolutionary  
147 convergence of mutation rates likely contributes to the difference in adaptation rates being less  
148 than what might be expected based on initial differences in mutation rates, but interestingly, the  
149 specific evolutionary mechanisms underlying these similarities are different. These observations  
150 demonstrate how transfer schemes can affect the evolutionary dynamics of mutation rates in  
151 asexual populations.

152  
153 **Genome evolution rates are less different than predicted by initial mutation rates.** To enhance  
154 our understanding of how the tempo and mode of genomic evolution relate to fitness and  
155 phenotypic evolution, we performed metapopulation sequencing of each experimental population  
156 roughly every 100 days to acquire mutation profiles of associated derived allele frequencies  
157 (DAFs). For each combination of genetic background and transfer size, we estimated the rate of  
158 genomic evolution by regressing the number of mutations per clone (i.e., the sum of DAFs of all  
159 observed SNPs) of all populations against the number of generations at each sampled time point.  
160 Because a quadratic regression model did not significantly outperform the linear regression ( $P =$   
161  $0.028$  for MMR-/L;  $P > 0.10$  for the others, nested ANOVA), we will focus on the results of the  
162 linear regression below.

163 As with the rate of adaptation, for all three transfer sizes, the ratio of the rate of genomic  
164 evolution between the two backgrounds (MMR-: WT) was much smaller than the initial difference  
165 in mutation rates (**Fig. 3A**). For example, under the L transfer size, the rate of genomic evolution  
166 is 115 (SE = 5.3) and 30 (SE = 4.3) mutations per clone per 1000 generations for MMR- and WT

167 populations, respectively. Therefore, the ratio of the genomic-evolution rates is only 3.8 (SE =  
168 0.58). Similarly, in the M and S transfer sizes, the ratio is 20 (SE = 1.3) and 23 (SE = 1.6),  
169 respectively. This observation remained qualitatively similar even when different kinds of  
170 measurements for genomic divergence were used, e.g., the number of detected mutations (**Fig.**  
171 **S3A**), nucleotide diversity (**Fig. S3B**), or when genomic divergence was estimated only by  
172 synonymous SNPs (**Fig. S4**).

173 To further survey how genomic evolution rates vary across experimental populations and  
174 to determine if the mean rates accurately represent the majority of experimental populations, we  
175 separately measured the rate of genomic evolution for each experimental population (**Fig. S5**).  
176 This revealed that the distribution of rates in the WT populations under the L transfer size is wider  
177 than the distributions of rates in all other combinations of genetic background and transfer sizes.  
178 Specifically, in the L transfer size, although five of the eight WT populations exhibit a genomic  
179 evolution rate of ~10 mutations per clone per 1000 generations, one WT population (115) has a  
180 rate about 2× higher, and two WT populations (101 and 113) have a rate close to 100, similar to  
181 MMR- populations. Consistent with the results of fluctuation tests noted above, these results  
182 suggest that some, but not all, WT populations under the L transfer size evolved a higher mutation  
183 rate (see Discussion).

184  
185 **Mutations arising in hypermutators are more likely to be fixed.** Using longitudinal  
186 metagenomics-sequencing data allows one to observe evolutionary dynamics at the level of single  
187 mutations and thus better understand the entire adaptive process. Here, we will focus on fixed  
188 mutations because they are more likely to contribute to adaptive processes than polymorphic  
189 mutations or other mutations that are transient in a population. Because our experimental-

190 environment setting facilitates the development of subpopulation structure, we applied clade-  
191 aware hidden Markov chain (caHMM) analysis. Assuming coexistence of two clades (major and  
192 minor) in the population, caHMM considers each mutation's DAFs found in different sequencing  
193 time-points and then infers which clade each mutation belongs to, whether each mutation reaches  
194 within-clade fixation, and when a fixed mutation reaches fixation (Good et al. 2017).

195 One characteristic parameter in an adaptive process is the probability that mutations reach  
196 fixation in a population. With the observed numbers of both detected and fixed mutations, we first  
197 tested whether hypermutator populations have a different probability of mutation fixation within  
198 clades compared to WT populations. Different mutation types have a different potential to impact  
199 populational fitness. For example, compared to synonymous SNPs, nonsynonymous SNPs have a  
200 greater potential to change protein functions, intergenic SNPs have a greater potential to change  
201 protein expression, and structural variations (SVs; including indels and mobile-element insertions)  
202 have a greater potential to disrupt a protein. Therefore, we performed separate tests on the  
203 conditional fixation probability for these four functional categories of mutations.

204 While not always significant, the fixation probability in the MMR- populations is generally  
205 higher than in WT populations across different transfer sizes and different categories of mutations  
206 (**Fig. 4A**). The fixation probability is similar across different categories of mutations, regardless  
207 of their perceived potential to affect fitness, suggesting that the fixation of most mutations is a  
208 consequence of genetic hitchhiking as opposed to intrinsic beneficial effects.

209 Another critical factor determining the temporal dynamics of a mutation is the underlying  
210 fitness effect. With the temporal data of allele frequencies for a mutation, we can quantify the net  
211 selection coefficient, which reflects its own fitness effects but can be potentially affected by the  
212 effects of linked mutations. We did not find a significant difference between the selection

213 coefficients of fixed mutations in the two genetic backgrounds (**Fig. 4B**). More importantly, we  
214 also found that different categories of mutations show similar mean selection coefficient estimates,  
215 which again suggests a pivotal contribution of hitchhiking effects to the mutational dynamics of  
216 genome evolution these in asexual populations.

217

218 **Neutrality tests reveal partial evidence for positive selection.** In theory, comparing the number  
219 of fixed mutations in functional categories of sites with different potential effects on fitness can  
220 summarize general patterns in the mode of genome evolution (McDonald and Kreitman 1991;  
221 Rand and Kann 1996). If a population has experienced strong positive selection on protein function  
222 or expression, it is expected that there will be more fixed mutations with a greater potential to  
223 change protein function or expression than mutations with smaller such potential. If a population  
224 has experienced purifying selection on protein function or expression, it is expected that there will  
225 be less fixed mutations with a greater potential to change protein function or expression than  
226 mutations with smaller such potential. Therefore, the ratio of the number of fixed nonsynonymous  
227 synonymous SNPs ( $F_N$ ) to the number of fixed synonymous SNPs ( $F_S$ ) or the ratio of the number  
228 of fixed intergenic SNPs ( $F_I$ ) to  $F_S$  is predicted to be large with a strong positive selection.  
229 Similarly,  $F_N/F_S$  or  $F_I/F_S$  are predicted to be small with a strong purifying selection. However,  
230 these ratios are not directly comparable in MMR- and WT backgrounds, because the two genetic  
231 backgrounds have varied mutational spectra and different relative rates of nonsynonymous and  
232 synonymous mutations (Lee et al. 2012). To address this issue, we normalized the observed  $F_N/F_S$   
233 by the ratio of nonsynonymous and synonymous mutations ( $U_N/U_S$ ) previously observed in a  
234 mutation accumulation experiment which utilized our exact ancestral genotypes (Lee et al. 2012).  
235 The ratio of these ratios,  $(F_N/F_S)/(U_N/U_S)$ , will be referred to as the neutrality index of

236 nonsynonymous SNPs, since being significantly  $> 1.0$  or  $< 1.0$  implies a predominance of positive  
237 selection in driving mutation fixation or a predominance of purifying selection in driving mutation  
238 extinction. It is analogous to Tachida's index for neutrality (Tachida 2000) but with a different  
239 normalizing approach – *via* results from mutation-accumulation experiment instead of  
240 polymorphism. This definition of the neutrality index can be applied to any kind of mutations. For  
241 example, we also define the neutrality index of intergenic SNPs as  $(F_I/F_S)/(U_I/U_S)$ , where  $U_I$  is the  
242 number of intergenic mutations observed in mutation accumulation (Lee et al. 2012).

243         The neutrality index of nonsynonymous SNPs in MMR- populations under the L transfer  
244 size is significantly larger than one, consistent with the model of strong positive selection (**Fig.**  
245 **4C**). Moreover, the neutrality index of intergenic SNPs in MMR- populations under all transfer  
246 sizes is significantly smaller than one, suggesting overall strong purifying selection on intergenic  
247 SNPs (**Fig. 4D**). On the contrary, the neutrality index in WT populations is never significantly  
248 different from one. While this can indicate a weaker strength of selection in WT populations, it  
249 may also be the result of insufficient statistical power due to an overall smaller number of fixed  
250 SNPs in WT populations, evident by their large confidence intervals associated with the point  
251 estimation.

252

253 **Parallel evolution of fixed mutations at the genic and nucleotide level.** As the previous analysis  
254 suggests that the statistical power of the neutrality index to reveal positive selection may be  
255 insufficient, we also considered parallelism of fixed mutations to examine the action of positive  
256 selection, using two different metrics. First, we utilized a sum of  $G$ -scores to measure the excess  
257 parallelism across fixed nonsynonymous mutations relative to the expectation based on gene  
258 lengths (Tenailon et al. 2016). For each gene, a higher  $G$ -score implies that the gene is more

259 enriched for fixed nonsynonymous mutations than expected by gene length. We then summed the  
260 *G*-scores of all genes for each combination of genetic background and transfer size and found  
261 statistical significance in all cases (*z*-test, **Fig. 5A**). Second, we calculated the mean Bray-Curtis  
262 similarity of the number of fixed nonsynonymous mutations across all genes (Turner et al. 2018)  
263 for all pairwise comparisons of evolved populations in each combination of genetic background  
264 and transfer size. The results again show statistical significance for similarity in all cases (*z*-test,  
265 **Fig. S6**). Therefore, both findings suggest that positive selection has shaped the genomic evolution  
266 of populations in all genetic-background / transfer-size combinations.

267         The analysis of parallelism also helps reveal which mutations are most likely to be drivers  
268 of adaptation. Using the same *G*-score analysis, in each genetic-background/transfer-size  
269 combination, we identified genes that were overrepresented for fixed nonsynonymous mutations  
270 ( $P < 0.05$ , Bonferroni correction; **Fig. 5B**). Gene Ontology (GO) analysis on these gene subsets  
271 revealed that significantly enriched GO terms were often related to transcription regulation and  
272 biofilm formation (**Table S1**). Using similar methods, we also identified subsets of genes enriched  
273 for fixed mutations in intergenic regions (**Fig. 5C**) and for structural mutations, including indels  
274 and IS-element insertions (**Fig. 5D**). Together, the genes in these lists serve as good candidates for  
275 revealing the various mechanisms important to adaptation in complex environments (see  
276 Discussion).

277         In addition to genic-level parallelism, we also identified nucleotide-level parallelism. In  
278 particular, 197 cases of parallel fixed nonsynonymous mutations were identified in at least two  
279 experimental populations within the same combination of transfer size and genetic background  
280 (**Table S2**). Because the probability that fixed mutations would occur by chance at a given  
281 nonsynonymous site in at least two experimental populations is very low, the observed parallelism

282 at the nucleotide-level again suggests positive selection and identifies important candidates for  
283 studying the molecular mechanisms associated with adaptation in complex media. For example,  
284 three instances of parallel mutation within *fimH* were located in its mannose-binding domain, and  
285 therefore may be good candidates for future functional studies of cell-adhesion (Schembri et al.  
286 2001). Furthermore, three instances of parallel-fixed nonsynonymous mutations were found in  
287 genes with GO terms associated DNA repair or DNA replication, including *dnaE* (DNA pol III  
288 subunit  $\alpha$ ), *yajL* (protein/nucleic acid deglycase 3), and *nrdA* (ribonucleoside-diphosphate  
289 reductase 1,  $\alpha$  subunit dimer). As all three of these cases arose in M and S transfer sizes with  
290 MMR- backgrounds, they may be good candidates for studying the molecular mechanisms  
291 associated with lowering mutation rates.

292

## 293 **Discussion**

294 Here, we describe the effect of the initial mutation rate on the rate of fitness improvement and  
295 genomic evolution by experimentally evolving *E. coli* with two distinct mutation-rate backgrounds.  
296 While the initial difference in mutation rates of these two genetic backgrounds is  $>100\times$ , after 900  
297 days of evolution, the differences in the net rates of fitness improvement (0.7-2.7 fold), in the  
298 mutation rates (12-32 fold), and in level of genome evolution (4-23 fold) are much smaller. At the  
299 resolution of single mutations, we found that mutations arising in MMR- populations exhibit  
300 higher fixation probabilities than mutations in WT populations, while mutations in different  
301 categories with presumably different fitness effects show similar fixation probabilities within each  
302 genetic-background treatment, suggesting the strong influence of hitchhiking effects in genome  
303 evolution in these populations. Despite the strong linkage and pervasive genetic draft, there is still  
304 evidence, in the form of a high degree of parallelism in mutations arising in particular genes and

305 nucleotides, that positive selection shapes genome evolution in all transfer-size/genetic-  
306 background combinations. The observed mutations with high parallelism also serve as excellent  
307 candidates for understanding the mechanisms of adaption to the complex conditions provided by  
308 the experimental environment.

309

310 **Effects of high mutation rates on evolution.** Our experiments reveal that, even for 900 days of  
311 evolution in a complex medium, hypermutating *E. coli* does not necessarily exhibit a faster rate of  
312 adaptation than wild-type *E. coli*. This observation is consistent with previous experimental-  
313 evolution results over a shorter period and in simpler media, such as glucose medium DM25 for  
314 1000 generations (Arjan et al. 1999) and glucose medium DM1000 for 3000 generations  
315 (Sprouffske et al. 2018). Our experiments further demonstrate that populations with initially  
316 hypermutator backgrounds can rapidly evolve lower mutation rates. Together with other empirical  
317 work on prokaryotic (Sprouffske et al. 2018) and eukaryotic hypermutators (McDonald et al. 2012),  
318 these results suggest that the strong genetic load due to deleterious mutations remains a pivotal  
319 factor in the evolution of mutation rates, consistent with the drift-barrier hypothesis (Lynch 2010b;  
320 Sung et al. 2012). Even when some new hypermutator alleles can spread in a population by linkage  
321 with other beneficial mutations during the adaptive process and thus briefly improve the rate of  
322 adaptation (Sniegowski et al. 1997; Tenaillon et al. 1999; Tenaillon et al. 2001), such events are  
323 usually transitory (Giraud et al. 2001; Desai and Fisher 2007; Wielgoss et al. 2013). Moreover, the  
324 fact that lowering the mutation rate could not have involved a reversion of deleted MMR in our  
325 experiments implies that there is excess capacity for improving replication fidelity through other  
326 parts of *E. coli* genome. As mutation-rate evolution occurred over a relatively short period in our



327 study, the results bear on several critical questions for future studies, including the rapidity of the  
328 dynamics of the evolution of mutation rates and the consequences for the mutational spectrum.

329

330 **Effect of genetic linkage in evolution.** In asexual populations with reduced recombination, the  
331 fate of a mutation is largely affected by its association with other mutations due to strong genetic  
332 linkage (Gillespie 2000; Neher 2013; Couce et al. 2017). Extensive hitch-hiking is a feature of our  
333 evolving *E. coli* populations, as we observe similar fixation probabilities and net associated fitness  
334 effects for fixed mutations across different functional categories of mutations. To better illustrate  
335 this effect of genetic linkage, we showed that the temporal DAF changes of any two SNPs in the  
336 same genome are highly correlated (i.e., a rightly-skewed distribution of correlation coefficients)  
337 and result in more largely positive correlation coefficients than for a random expectation of non-  
338 linked mutations (**Fig. S7**). Accordingly, pre-existing non-beneficial mutations can become fixed  
339 by hitchhiking with newly-arising beneficial mutations, and these linkage effects can limit the rate  
340 of adaptation (Schiffels et al. 2011; Kosheleva and Desai 2013). Therefore, even though MMR-  
341 populations show a range of genome-evolution rates 4 - 23× higher than WT populations, the  
342 excess of fixed mutations does not directly contribute to adaptation rates.

343

344 **Effects of transfer sizes in evolution.** The three different transfer sizes (L, M, and S) implemented  
345 in our evolution experiment allow us to compare adaptive processes in different population-genetic  
346 environments. In theory, when the transfer size is large, reduced genetic drift renders a higher  
347 efficiency of promotion of beneficial mutations in a population. Consistent with this theoretical  
348 prediction, the populations cultured with the L-transfer size show highest rates of fitness gain (**Fig.**  
349 **1**), for nonsynonymous mutations, the observed neutrality index of MMR- populations under L

350 transfer size is lowest and  $< 1.0$  (**Fig. 4C**). Compared to L-transfer treatment, the populations  
351 cultured with the S-transfer size may have accumulated more deleterious mutations and thus show  
352 less fitness improvement.

353 We also found that the populations under the L-transfer size tend to evolve higher mutation  
354 rates (**Fig. 2**), as hypermutator alleles may hitchhike with more selective sweeps of beneficial  
355 mutations. Previous research has also demonstrated that the spread of hypermutator alleles tends  
356 to be found in populations with a larger population size or weaker bottleneck effects (Raynes et al.  
357 2014). As a result, even though the mutation rates of lines in two genetic backgrounds (WT and  
358 MMR-) evolved to be closer during the experiments with all three transfer sizes, the driving  
359 mechanisms are different between populations under the L transfer size and those under M or S  
360 transfer sizes (**Fig. 2**).

361 In theory, the evolved populations under larger transfer sizes experienced a relatively  
362 longer duration of stationary phase between transfers as the number of divisions needed to reach  
363 the stationary phase are smaller. Given that the physiological features of *E. coli* can be different in  
364 different growth phases (Pletnev et al. 2015), the evolutionary pressure under different transfer-  
365 sizes may also be different. Therefore, interpreting any results based on the comparison across  
366 transfer-size treatments needs more caution. In our case, however, such differences are likely  
367 limited, as we still found significant parallelism in the fixed enriched mutations across different  
368 transfer sizes (**Fig. S8**). Whether there is any adaptation specific to the different growth phases or  
369 different combinations of growth phases is a subject for future studies.

370

371 **The possible role of biofilm formation in adaptation.** With respect to the specific genes and  
372 biological processes that appear to be targets for adaptation, our analysis of candidate genes

373 suggests that biofilm formation is an important characteristic in adapting to the complex setting  
374 imposed by the experimental environment. In particular, the formation of type I fimbriae is critical  
375 for biofilm formation in *E. coli* (Pratt and Kolter 1998). Consistently, several genes enriched for  
376 fixed nonsynonymous mutations are related to formation of type I fimbriae (**Fig. 5B**), including  
377 *fimH* and *fimG*, which account for components the type I fimbriae (Waksman and Hultgren 2009;  
378 Le Trong et al. 2010), *fimB* and *fimE*, which regulate the expression of *fimAICDFGH* operon  
379 (Olsen et al. 1998), and *proQ* (RNA chaperone) and *lsrK* (autoinducer-2 kinase), which also  
380 facilitate biofilm formation (Li et al. 2007; Sheidy and Zielke 2013). We additionally observed an  
381 enrichment of mutations in the intergenic region of *fimE/fimA* (**Fig. 5C**) which contains a phase-  
382 variable promoter for regulating the expression of the *fimAICDFGH* operon (Abraham et al. 1985;  
383 Spears et al. 1986). Lastly, the list of genes enriched with structural mutations (**Fig. 5D**) also  
384 include *fimE*, which primarily turns off the expression of *fimAICDFGH* operon, and several genes  
385 related to *gatYZABCD* operon, including *gatZ*, *gatB*, and *gatA*, whose deletions can increase  
386 biofilm formation (Domka et al. 2007). Many of these candidate genes related to type I fimbriae  
387 contributed to the adaptation in an earlier experimental environment of a similar nature (Behringer  
388 et al. 2018). Moreover, structural mutations in *gatZ* and *gatA* genes have been found to contribute  
389 to the initial adaptation of *E. coli* in a mouse gut, another example of a complex environment  
390 (Barroso-Batista et al. 2014). Studying the genetic variants promoting the evolution of biofilm in  
391 complex environments may be of particular interests in the field of public health, as the evolution  
392 of biofilm has been considered to be related to the evolution of microbial social behaviors (Tarnita  
393 2017), the evolution of pathogenicity (Kaper et al. 2004; Naves et al. 2008; Rossi et al. 2018), and  
394 the evolution of antibiotic resistance (Avalos Vizcarra et al. 2016; Sharma et al. 2016). Thus,

395 understanding the evolution of biofilm formation may be key to increasing the efficiency of  
396 treatments in patients to combat the fast emergence of antibiotic resistance and pathogenicity.

397

398 **Candidate transcriptional regulators involved in adaptation.** Because we have provided fresh  
399 media every day during the experimental evolution, a fast switch from stationary phase to  
400 exponential growth phase may bring benefits to the evolving populations (Monod 1949; Navarro  
401 Llorens et al. 2010). Interestingly, several genes enriched in fixed nonsynonymous mutations in  
402 our study are transcription regulators, including *arcA*, *cadC*, *cytR*, *rbsR*, *rseB*, and *sspA* (**Fig. 5B**).  
403 The genes enriched in structured variations also include transcription regulators, such as *arcB*,  
404 *cadC*, *rpoS*, and *nlpD* (**Fig. 5C**). The mutations on these genes may contribute to the transcriptomic  
405 reprogramming for the fast switch from stationary phase to exponential phase. For example, *rseB*  
406 is a negative regulator of the stationary phase effector, sigma factor E (Missiakas et al. 1997); and  
407 both *cytR* and *rbsR* are repressors to the carbon limitation effector, cAMP-CRP (Bell et al. 1986;  
408 Mauzy and Hermodson 1992; Kristensen et al. 1996). Therefore, gain-of-function mutations on  
409 these three genes can theoretically reduce the chance that cells stay in stationary phase. In addition,  
410 *arcA*, *arcB*, *cadC*, *rpoS*, and *sspA* are known as stress-responding activators (Iuchi et al. 1989;  
411 Lange and Hengge-Aronis 1991; Watson et al. 1992; Williams et al. 1994; Rolfe et al. 2011).  
412 Therefore, loss-of-function mutations on these genes are presumably beneficial in the experimental  
413 environment involving a frequent supply of fresh media and presumably imposing low stress.  
414 Further investigation will be needed to determine whether any of these mutations can bring such  
415 benefits to our experimentally evolved populations.

416

417 **Concluding Remarks.** To sum up, our results reveal that high mutation rates in *E. coli* have only  
418 a very limited influence on the rate of adaptation. Our findings may provide useful insights for  
419 clinically relevant processes involving asexual populations, such as the evolution of improved  
420 growth rates in pathogens and the emergence of antibiotic resistance in natural or host environment.  
421 In particular, our experimental evolution results in complex media are likely to be more  
422 representative, as natural or host environments are usually highly heterogeneous. For example, a  
423 combination of the occasional emergence of hypermutators under weaker bottlenecks and the  
424 consistent evolution of antimutators under stronger bottlenecks may explain why a low to  
425 intermediate frequency of hypermutators is usually found in pathogen populations (Couce et al.  
426 2016; Veschetti et al. 2020). Whether the elevated mutation rates affect adaptation rates and the  
427 pattern of genome evolution in these populations under natural or host environments should be  
428 subject to future research. For example, hypermutators may be critical for a founding population  
429 in a new environment, especially with epistasis in the fitness landscape, but such effect of  
430 hypermutation can diminish after a long time (Mehta et al. 2019).

431

## 432 **Materials and Methods**

433 **Strains.** The ancestral strains used in experimental evolution are descendants of PMF2 and  
434 PMF5, provided by the Foster Lab (Lee et al. 2012). PMF2 is a prototrophic derivative of *E. coli*  
435 K-12 str. MG1655, and its genetic background is called by WT in the paper. PMF5 is derived  
436 from PMF2 with *mutL* deletion, providing the MMR- genetic background. For both kinds of  
437 strains, a 3513 bp deletion to the *araBAD* operon is further introduced by lambda red  
438 recombineering as a neutral marker. Plates with TA agar (1% Arabinose, 1% Tryptone, 0.5%  
439 NaCl, 0.1% Yeast Extract, 0.005% TTC (Sigma T8877)) is used for examining the deletion of

440 *araBAD* operon. The colonies with deletion (*ara-*) appear to be pink; otherwise, the colonies  
441 (*ara+*) appear to be purple.

442

443 **Experimental evolution.** When we established the experimental populations, the ancestral  
444 strains were first cultivated overnight at 37 °C on LB agar plates, and then their single-isolated  
445 progenitor colonies were inoculated in a 16- × 100-mm glass tube with 10 mL of LB-Miller  
446 broth (BD Difco). The tubes were cultured at 175 rpm shaking at 37 °C. Every day, cultures are  
447 thoroughly-vortexed and transferred into a new tube with 10 mL of fresh LB broth. Three  
448 different transfer sizes are used: 1 mL(large), 1uL(medium), and 1nL(small), which correspond  
449 to different dilution factors:  $10^{-1}$ ,  $10^{-4}$ , and  $10^{-7}$ . Initially, for each combination of genetic  
450 background and transfer sizes, we set up eight replicate tubes in three groups with different  
451 transfer sizes. For preventing cross-contamination, four replicates are *ara-* and four replicates  
452 are *ara+*. During the experimental evolution, experimental populations at day 90, 200, 300, 400,  
453 500, 600, 700, 800, 900 were frozen in -80 °C freezers for analysis.

454

455 **Competition assay.** When evaluating the fitness of an evolved population (*ara-*), we inoculated  
456 the corresponding frozen sample in a tube with 10 mL of fresh LB broth at 37 °C shaking at 175  
457 rpm overnight. We also inoculated the corresponding ancestral population in a tube with 10 mL  
458 of fresh LB broth at 37 °C shaking at 175 rpm overnight. We then put 50 uL aliquot from  
459 evolved populations and 50 uL aliquot from evolved populations to into a new tube with 10 mL  
460 of LB broth at 37 °C shaking at 175 rpm for 24-hr competition. Immediately after inoculation  
461 (day 0) and after 24-hr competition (day 1), we used plate-counting to determine the colony-  
462 forming units (CFU) of both ancestral and evolved strains. Specifically, we serially diluted

463 100uL aliquot in 900 uL phosphate buffered saline. To distinguish the evolved population from  
464 the ancestors, we plated serially diluted aliquots on TA agar because *ara*- colonies will appear to  
465 be pink, while the ancestral (*ara*+) will appear to be purple. The TA plates were then incubated  
466 at 37 °C overnight. We then identified the plate with total colonies 30-300 and counted the  
467 number of colonies for the evolved population and the ancestors. Based on the colony numbers  
468 and the dilution factor during the serial dilution, we then calculated the CFU of ancestors before  
469 the competition ( $A_0$ ), the CFU of ancestors after the competition ( $A_1$ ), the CFU of the evolved  
470 population before the competition ( $E_0$ ), and the CFU of the evolved population after the  
471 competition ( $E_1$ ). The fitness of the evolved population ( $w$ ) relative to the ancestor was then  
472 calculated by the following formula:

$$473 \quad w = \ln(E_1/E_0) / \ln(A_1/A_0),$$

474 which is the ratio of two Malthusian parameters (Lenski et al. 1991).

475 At day 0, we also serially diluted and plated 100uL aliquot of evolved population as a  
476 control. For an evolved population, if both purple and pink colonies in the countable control  
477 plates (30-300 colonies per plate), its data will be discarded from the analysis because we are  
478 not sure about the source of the pink colonies in the experimental plates.

479  
480 **Fluctuation test and mutation rate estimation.** We quantified mutation rates of evolved  
481 populations (at day 900) and ancestors by fluctuation tests (Foster 2006). Briefly, fluctuation  
482 tests measure the rate of resistance to the antimicrobial rifampicin which is conferred by  
483 mutations to *rpoB*. For each combination of genetic background and transfer size, the four *ara*-  
484 populations were assayed. For each population, two biological replicates with different starting  
485 clones were assayed. For each of the WT or MMR- ancestor, we also run replicate experiments

486 in different starting clones. For each clone, 40 replicate experiments were performed. Number of  
487 mutants as determined by CFU/mL were converted to an estimated mutation rate and a  
488 corresponding 95% confidence interval by the function “newton.LD” function in the R package  
489 “rSalvador”(Zheng 2017).

490  
491 **DNA isolation and high-throughput sequencing.** We conducted high resolution population  
492 tracking by collecting 1 mL of culture at day 90, 200, 300, 400, 500, 600, 700, 800, and 900 of  
493 experimental evolution. We used the DNeasy UltraClean Microbial Kit (Qiagen 12224; formerly  
494 MO BIO UltraClean Microbial DNA Kit) to extract DNA. For library preparation and  
495 sequencing, we submitted DNA to either the Hubbard Center for Genomic Analysis at the  
496 University of New Hampshire, the Center for Genomics and Bioinformatics at Indiana  
497 University, or the CLAS Genomics Facility at Arizona State University for library preparation  
498 and sequencing. Library preparation was done by the Nextera DNA Library Preparation Kit  
499 (Illumina, FC-121-1030) following an augmented protocol for optimization of reagent use  
500 (Baym et al. 2015) before being pooled and sequenced as paired-end reads on an Illumina HiSeq  
501 2500 (UNH) or an Illumina NextSeq 500 (Indiana; ASU). The target depth is 100X.

502  
503 **Sequencing analysis.** We performed Sequencing analysis on the Mason and Carbonate high-  
504 performance computing clusters at Indiana University. The quality control of sequencing reads  
505 were performed by Cutadapt v.1.9.1 (Martin 2011), which removes residual adapters and trims  
506 low quality sequences. The qualified sequencing reads were then mapped to the *Escherichia coli*  
507 K-12 substr. MG1655 reference genome (NC\_000913.3). All mutations and their derived allele  
508 frequencies (DAFs) were identified using Breseq v.0.30.2 with the predict-polymorphisms



509 parameter setting (Deatherage and Barrick 2014). Furthermore, several criteria of further quality  
510 checks were applied to the samples which we will only include in the following analysis: (1)  
511 mean sequencing depths  $> 10$ ; (2) any WT sample identified to contain the 1,830 bp deletion in  
512 *mutL* from the PMF5 progenitor strain was discarded; (3) regions lacking sequencing coverage  
513 (i.e. depth = 0) must be smaller than 5% of the genome; and (4) the sequencing result should  
514 reflect the correct genetic background in terms of *ara* markers, including a nonsynonymous SNP  
515 at position 66528, an intergenic SNP at position 70289, and a multiple base substitution mutation  
516 (SUB) at position 66533. For an *ara+* population, we required either of two SNPs showing DAF  
517  $< 0.2$ . For an *ara-* population, we required either of two SNPs showing DAF  $> 0.8$  or the SUB is  
518 detected.

519 In the end, 396 genomic profiles passed QC and were included in the following analysis  
520 (**Table S3**). In the case of M transfer size under WT background, only six out of eight replicates  
521 of evolved populations are left for the following analysis because the other two were potentially  
522 contaminated by MMR- strains. In the other five combinations of transfer size and genetic  
523 background, there are still eight replicates of evolved populations for the following analysis. For  
524 every evolved population subject to the following analysis, its sequencing profiles are available  
525 in at least seven different time points.

526 To make sure that we do not use the mutations that originated from the starting clone  
527 before experimental evolution in the analysis, we discarded any mutations with a DAF = 1.0 at  
528 one time point for at least 11 experimental populations with the same genetic background from  
529 the analysis. Furthermore, the highly repetitive sequences in *rsx* genes are known to cause errors  
530 in SNP calling (McCloskey et al. 2018), so they were also discarded from the analysis.

531

532 **Number of guaranteed generations.** Given the observation that carrying capacity of  
533 experimental populations can be recovered within a transfer period (i.e. one day), the  
534 guaranteed generation numbers in 900 days for dilution factors =  $10^{-1}$ ,  $10^{-4}$ , and  $10^{-7}$  were  
535 respectively estimated as 900 times of  $\log_2(10)$ ,  $\log_2(10^4)$ , and  $\log_2(10^7)$ , which is equal to ~  
536 3.0k, 12k, and 21k.

537

538 **Rate of genomic evolution.** The level of genomic divergence for each experimental population  
539 at each time point is defined by summing all DAFs of detected mutations. We then calculated the  
540 mean genomic divergence across all eligible experimental populations in each combination of  
541 transfer size and genetic background. We further performed the linear regression by the function  
542 “lm” in R with formula “mean genomic divergence ~ guaranteed generations + 0”, which  
543 enforces the y-intercept as 0. The slope of the regression is the estimated rate of genomic  
544 evolution. We also performed a nonlinear regression using the formula “mean genomic  
545 divergence ~ guaranteed generations + square root of guaranteed generations + 0”, which was  
546 previously proposed to catch the trend of diminishing returns (Tenailon et al. 2016).

547

548 **Identification of fixed mutations by hidden Markov chain.** For each population, clade-aware  
549 hidden Markov model (caHMM) was performed using a modified version (Behringer et al. 2020)  
550 of previously released code (Good et al. 2017). For the populations in which caHMM can not  
551 finish, we instead performed well-mixed hidden Markov chain (wmHMM) using a modified  
552 version (Behringer et al. 2020) of previously released code (Good et al. 2017). The single clade  
553 in wmHMM is defined as the basal clade. Fixed mutations are then defined as mutations that are  
554 inferred to be fixed in basal, major, or minor clade in the results of either analysis.

555

556 **Estimation of selection coefficients.** For each fixed mutation, we estimate its selection  
557 coefficients by its temporal data of DAFs. If a mutation is in the basal clade, no correction is  
558 needed. If caHMM infers a mutation belongs to the major or minor clade, its corrected allele  
559 frequency will be the DAF divided by the proportion of the population belonging to the major or  
560 minor clade (also inferred by caHMM). For each of two available consecutive time points  $i$  and  $j$ ,  
561 if the corrected allele frequencies at both time points ( $p_i$  and  $p_j$ ) are smaller than 0.95 and larger  
562 than 0.05, the selection coefficient is calculated as

563 
$$\ln \frac{p_j(1-p_i)}{p_i(1-p_j)} / (t_j - t_i),$$

564 where  $t_i$  and  $t_j$  is the number of guaranteed generations at time point  $i$  and  $j$ , respectively. The  
565 negative values are discarded. The largest positive value across all pairs of time point are used as  
566 the final measurement.

567

568 **Calculation of neutrality index.** As discussed in the main text, we defined  $(F_N/F_S)/(U_N/U_S)$  as  
569 the neutrality index of nonsynonymous SNPs, where  $F_N$  is the number of nonsynonymous SNPs  
570 fixed within a clade or fixed in an entire population,  $F_S$  is the number of synonymous SNPs fixed  
571 within a clade or fixed in an entire population,  $U_N$  is the number of nonsynonymous SNPs in the  
572 mutation- accumulation experiment, and  $U_S$  is the number of synonymous SNPs in the mutation  
573 accumulation-experiment. We also similarly defined  $(F_I/F_S)/(U_I/U_S)$  as neutrality index of  
574 intergenic SNPs, where  $F_I$  is the number of intergenic SNPs fixed within a clade or fixed in an  
575 entire population, and  $U_I$  is the number of intergenic SNPs in the mutation-accumulation  
576 experiment. The values of  $U_N$ ,  $U_S$ , and  $U_I$  are from a previously published mutation-  
577 accumulation experiment of our ancestral lines (Lee et al. 2012). We calculated population-

578 specific indexes and then acquired population-wise mean and SE. The populations with  $F_N = 0$   
579 and  $F_I = 0$  are discarded in the calculation of neutrality index of nonsynonymous and intergenic  
580 SNPs, respectively.

581  
582 **Calculation of G-scores.** For each combination of genetic background and transfer size, we  
583 quantified the parallelism of the fixed nonsynonymous mutations using the sum of  $G$ -scores  
584 across genes (Tenaillon et al. 2016). A larger  $G$ -score for a gene suggests that the fixed  
585 nonsynonymous mutations are more overrepresented in that gene. Specifically, to calculate a  
586 genic  $G$ -score ( $G_i$ ), we first counted the observed number of fixed nonsynonymous mutations in  
587 gene  $i$  ( $O_i$ ) per a combination of genetic background and transfer size. We then calculated the  
588 expected number for gene  $i$  ( $E_i$ ) by  $O_{\text{tot}}(L_i/L_{\text{tot}})$ , where  $O_{\text{tot}} = \sum_i O_i$ ,  $L_i$  is the number of  
589 nonsynonymous sites for gene  $i$ , and  $L_{\text{tot}} = \sum_i L_i$ . In the end,  $G_i$  is defined by  $2O_i \ln(O_i/E_i)$  or  
590 defined as zero when  $O_i = 0$  or when  $2O_i \ln(O_i/E_i) < 0$ .

591 It was noted that the null expectation of  $G$ -scores varies with total number of fixed  
592 nonsynonymous mutations (Behringer et al. 2020). Therefore, for each combination of genetic  
593 background and transfer size, we performed 20,000 simulations in each of which  $O_{\text{tot}}$  hits are  
594 randomly distributed among all  $L_{\text{tot}}$  sites across all genes in the reference genome. Then the  
595 significance of the sum of  $G$ -scores was evaluated by the  $z$  score defined by (the observed sum -  
596 mean of simulated sums) / (standard deviation of simulated sums).

597  
598 **Calculation of mean Bray-Curtis similarity.** For each combination of genetic background and  
599 transfer size, we also quantified the parallelism of the fixed nonsynonymous mutations using the  
600 mean Bray-Curtis similarity across all pairs of experimental populations for a TP/GB

601 combination (Turner et al. 2018; Behringer et al. 2020). Specifically, for a pair of populations  $j$   
602 and  $k$ , their Bray-Curtis similarity is defined by

$$603 \quad 1 - \frac{\sum_i |o_{ij} - o_{ik}|}{\sum_i (o_{ij} + o_{ik})},$$

604 where  $o_{ij}$  and  $o_{ik}$  is the observed number of fixed nonsynonymous mutations in gene  $i$  for  
605 population  $j$  and  $k$ , respectively.

606 For each combination of genetic background and transfer size, we also performed 1,000  
607 simulations to acquire the null distribution. In each simulation, we randomly sample the  
608 nonsynonymous sites up to the number of observed fixed nonsynonymous mutations for each  
609 population and calculated mean Bray-Curtis similarity as described above. After acquiring the  
610 null distribution, we evaluated the significance of the observed mean Bray-Curtis similarity by  
611 calculating the  $z$  score defined by (the observed value - mean of simulated values) / (standard  
612 deviation of simulated values).

613  
614 **Overrepresentation of the genes affected by nonsynonymous mutations.** To evaluate the  
615 significance of  $G$ -score for gene  $i$ , we directly compared the  $G_i$  to the distribution of 20,000  
616 simulated  $G_i$ , and the  $P$ -value was defined as the proportion of simulated  $G_i$  larger or equal to the  
617 observed  $G_i$ . For multiple test correction, we multiplied each gene's  $P$ -value by the number of  
618 genes with at least one hit by the set of fixed nonsynonymous mutations (Bonferroni correction).  
619 The genes are called significant only if the genes show Bonferroni corrected  $P$ -value  $< 0.05$ .

620  
621 **Enrichment test of GO terms and KEGG pathways.** Using the set of significant genes, we  
622 performed the enrichment test of gene ontology terms using the function “enrichGO” in R

623 package “DOSE” (Yu et al. 2015) with  $q$ -value cut-off = 0.05 and the organismal database as  
624 org.EcK12.eg.db. We also performed the enrichment test of KEGG pathways using the function  
625 “enrichKEGG” in the same package but found no terms with  $q$ -value < 0.05.

626

627 **Overrepresentation of the intergenic regions affected by fixed mutations.** The identification  
628 of the intergenic regions affected by mutations was also performed by the way similar to identify  
629 the genes affected by nonsynonymous fixed mutations in genic  $G$ -score approach (Tenaillon et  
630 al. 2016). Instead of focusing on genic regions, genome-wide intergenic regions are focused. For  
631 each combination of genetic background and transfer size, we first counted the observed number  
632 of intergenic mutations in intergenic region  $i$  ( $O_i$ ), and the expected number for intergenic region  
633  $i$  ( $E_i$ ) was calculated by  $O_{\text{tot}}(L_i/L_{\text{tot}})$ , where  $O_{\text{tot}} = \sum_i O_i$ ,  $L_i$  is the length for intergenic region  $i$ , and  
634  $L_{\text{tot}} = \sum_i L_i$ . The  $G$ -score for intergenic region  $i$  ( $G_i$ ) was then calculated by  $2O_i \ln(O_i/E_i)$ ,  
635 following the methods described in the above section. We also performed 20,000 simulations  
636 and determined the Bonferroni corrected  $P$ -value for each gene  $i$  following the methods  
637 described in the above section.

638

639 **Overrepresentation of the genes affected by structural fixed mutations.** The identification of  
640 the genes affected by structural fixed mutations was performed by the way similar to identify the  
641 genes affected by nonsynonymous fixed mutations in genic  $G$ -score approach (Tenaillon et al.  
642 2016). Structural mutations include indels and IS-element insertions. For each combination of  
643 genetic background and transfer size, we first counted the observed number of populations with  
644 any structural mutations in gene  $i$  ( $O_i$ ), and the expected number for gene  $i$  ( $E_i$ ) was calculated by  
645  $O_{\text{tot}}(L_i/L_{\text{tot}})$ , where  $O_{\text{tot}} = \sum_i O_i$ ,  $L_i$  is the gene length for gene  $i$ , and  $L_{\text{tot}} = \sum_i L_i$ . The  $G$ -score for

646 gene  $i$  ( $G_i$ ) was then calculated by  $2O_i \ln(O_i / E_i)$ , following the methods described in the above  
647 section.

648 We also performed 20,000 simulations and determined the Bonferroni corrected  $P$ -value  
649 for each gene  $i$  following the methods described in the above section. As a result, we found all  
650 the genes with  $O_i \geq 2$  show Bonferroni corrected  $P$ -value  $< 0.05$ .

651  
652 **Correlations between pairs of SNPs.** For each evolved population, we focused on the  
653 nonsynonymous, synonymous, and intergenic SNPs in which at least two nonzero DAFs were  
654 found. For each pair of two such SNPs, we calculated the change of DAFs. Then we calculated  
655 Pearson's correlation coefficients across only all the odd-numbered changes of DAFs to avoid  
656 non-independence (Lynch and Ho 2020). That is to say, if a population has sequencing profiles  
657 available for analysis at every sampling time points (days 90, 200, 300, 400, 500, 600, 700, 800,  
658 900), we will calculate Pearson's correlation coefficients using the five changes of DAFs: the  
659 one between day 0 and day 90, between day 200 and day 300, between day 400 and day 500,  
660 between day 600 and day 700, and between day 800 and day 900. For another example of  
661 population, if its sequencing profile at day 90 is discard from analysis due to low quality, the  
662 Pearson's correlation coefficients using only the four changes of DAFs: the one between day 0  
663 and day 200, between day 300 and day 400, between day 500 and day 600, between day 700 and  
664 day 800. Note that at least four changes of DAFs are used for each evolved population because  
665 no populations have more than two missing profiles. We then get the distribution of Pearson's  
666 correlation coefficients for each evolved population.

667 To establish the baseline for comparison in each combination of transfer size and genetic  
668 background, we also generated the set of Pearson's correlation coefficients using two random

669 mutations from two different random populations with all sequencing profiles available (i.e. they  
670 are unlinked for sure). We followed the same procedure above to calculate Pearson's correlation  
671 coefficients for each pair of unlinked mutations. When simulating a distribution of Pearson's  
672 correlation coefficients, we used 100 pair of unlinked mutations. We then repetitively performed  
673 100 rounds of simulation to get the mean and SE for the distribution.

674

### 675 **Data Availability**

676 Sequencing data generated during this study are available at NCBI's Sequencing Read Archive:  
677 BioProject PRJNA532905 and PRJNA722381.

678

### 679 **Code Availability**

680 Codes generated to analyze sequencing data are available at  
681 [https://github.com/LynchLab/ECEE\\_Hypermutator](https://github.com/LynchLab/ECEE_Hypermutator)

682

### 683 **Acknowledgements**

684 We thank D. Allan Drummond, Jay T. Lennon, and James B. McKinlay for their helpful  
685 comments. High Performance Computing Resources were provided and maintained by the  
686 National Center for Genome Analysis Support at Indiana University. This work was supported  
687 by Army Research Office Grants ARO65308-LS-MU and W911NF-14-1-0411 (M. L.) and  
688 National Institutes of Health Grant F32GM123703 (M. G. B.) and R35GM122566 (M. L.).

689

### 690 **Author Contributions**



691 Conceptualization, W-C.H., M.G.B., and M.L.; Methodology, W-C.H., M.G.B., and S.F.M.;  
692 Investigation, W-C.H., M.G.B., S.F.M., J.G., A.N., M.A., and G.F.B.; Formal Analysis, W-C.H.,  
693 and M.G.B.; Writing – Original Draft, W-C.H. and M.G.B.; Writing – Review & Editing, W-  
694 C.H., M.G.B., W-C.H., and M.L.; Visualization, W-C.H. and M.G.B.; Funding Acquisition,  
695 M.G.B. and M.L.

696

697 **Declaration of Interests**

698 The authors declare no competing interests.

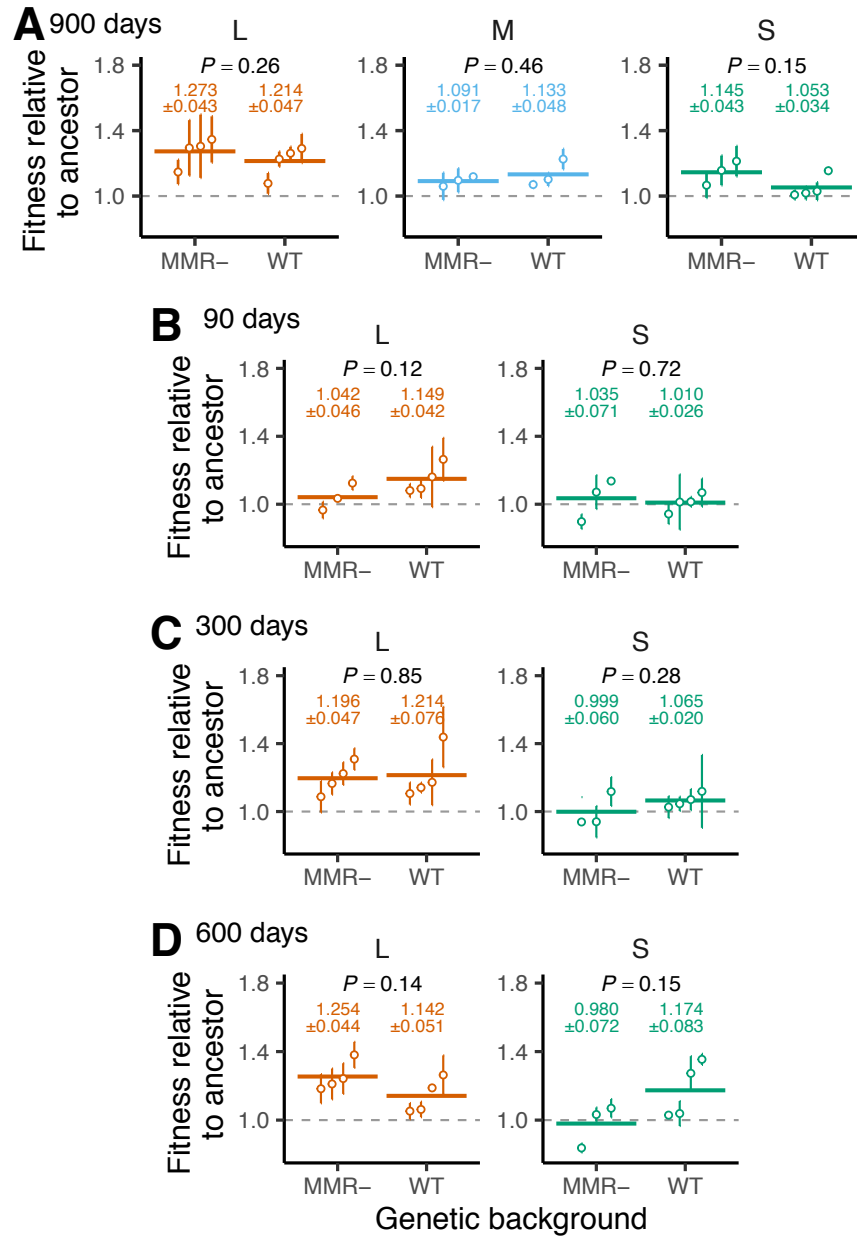

**Figure 1. Fitness improvement during experimental evolution.** For evolved populations under different transfer sizes (orange for L, blue for M, or green for S) and different genetic backgrounds (MMR- or WT), mean fitnesses relative to the ancestor at (A) day 900, (B) day 90, (C) day 300, or (D) day 600 are reported. Each open circle represents an estimated mean for an evolved population with at least three independent competition assays. The error bars represent SEs. Gray dashed lines represent no improvement from ancestral fitness. The means across all evolved lines for a combination of transfer size and genetic background are represented by colored horizontal lines; the numeric values of means and SEs are printed on the top. The *P*-values for nested ANOVA are also shown on the top.

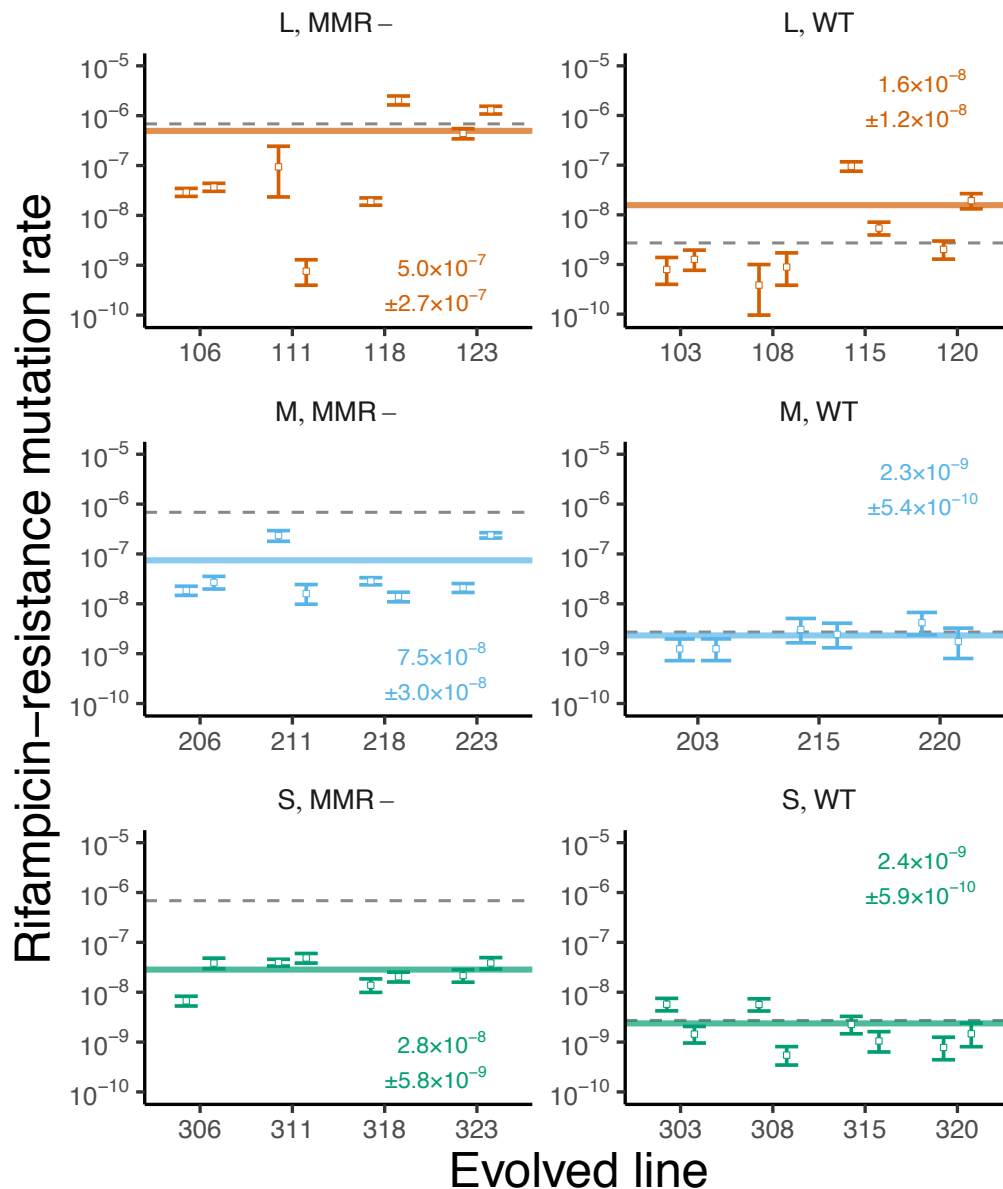

**Figure 2. Evolution of mutation rates after 900 days of experimental evolution.** Each panel shows mutation rates of evolved populations in different combinations of transfer sizes (L, M, or S) and genetic background (MMR- for mismatch repair defective or WT for wild-type). In each combination, three or four evolved populations were tested. Two clones per evolved population were isolated and measured. The open circles and error bars represent the mean and the 95% confidence interval for each clone. The grey dashed line represents the mutation-rate measurement of the corresponding ancestor. The colored horizontal lines represent the mean mutation-rate measurement of each combination; the value of means and their SEs are also printed.

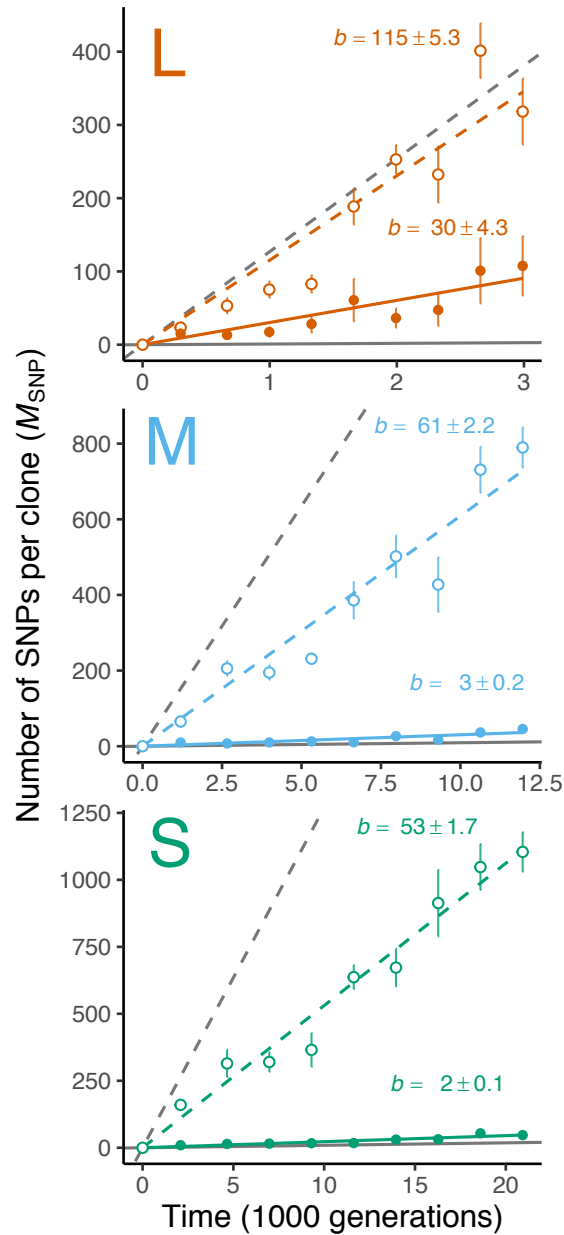

**Figure 3. Rate of genomic evolution in evolved populations.** Each panel shows the results of evolved populations in two genetic backgrounds (MMR- and WT) in a transfer size (L, M, or S). Each dot shows a mean number of SNPs per clone for MMR- (open circles) or WT (closed circles) populations at a sequencing time point. The error bars represent the associated standard errors. The dashed and solid lines are linear regressions against the time for MMR- and WT populations, respectively. The estimated slope ( $b$ ) and associated standard error are also printed for each regression line. The grey dashed and solid lines represent how evolved populations are expected to accumulate mutations based on the initial mutation rates of MMR- and WT ancestors.

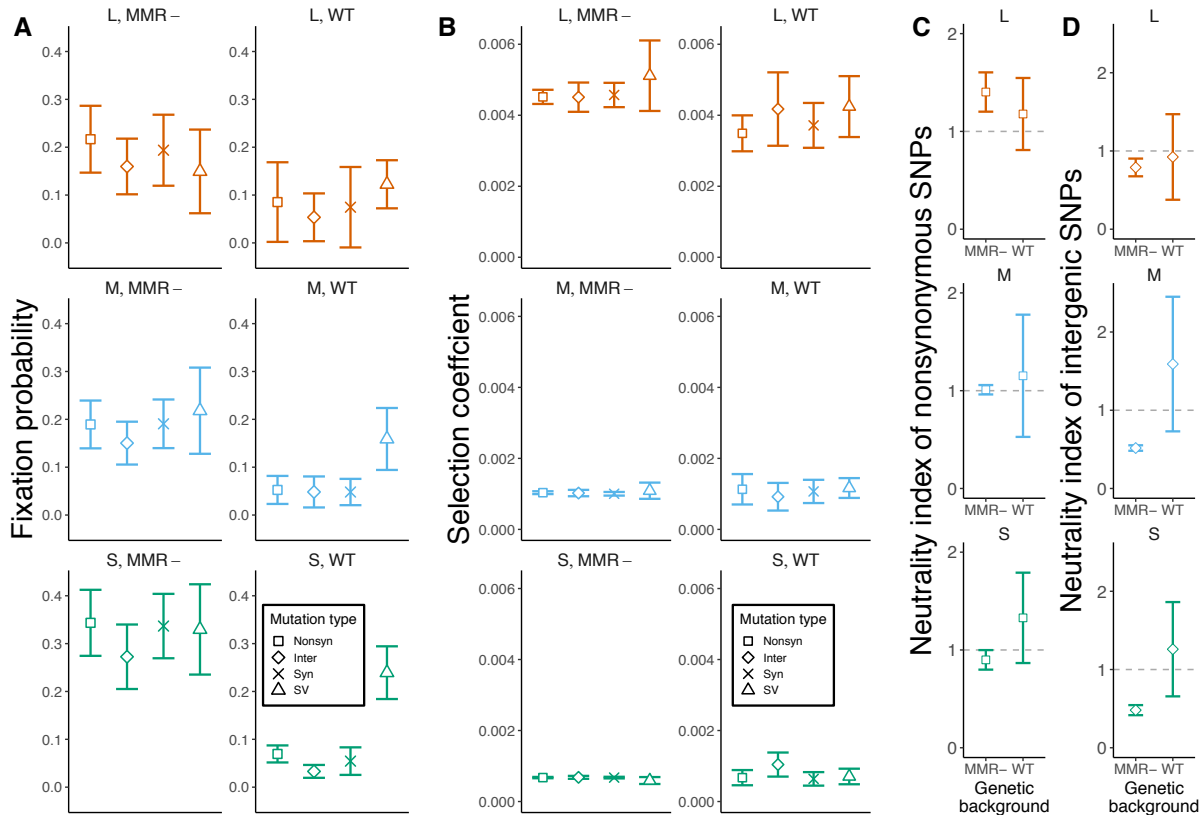

**Figure 4. Analysis of strength of natural selection associated with fixed mutations in different categories in different treatments of experimental evolution.** (A) Each symbol shows the population mean probability of nonsynonymous mutations (squares), intergenic mutations (diamonds), synonymous mutations (crosses), or structure variation mutations (SV; triangles) that reached within-clade fixation in each combination of transfer size (L, M, or S) and genetic background (MMR- or WT). The error bars show the 95% confidence intervals. (B) Each symbol shows the mean selection coefficient of nonsynonymous mutations (squares), intergenic mutations (diamonds), synonymous mutations (crosses), or SV (triangles) that are fixed in any clade in any population belonging in a combination of transfer size and genetic background. The error bars show the 95% confidence intervals. (C) Each square shows the population mean neutrality index of nonsynonymous mutations for a combination of transfer size and genetic background. The error bars show the 95% confidence intervals. The grey lines indicate where the value = 1.0. (D) Each square shows the population mean neutrality index of intergenic mutations for a combination of transfer size and genetic background. The error bars show the 95% confidence intervals. The horizontal grey lines denote the point of neutrality (1.0).

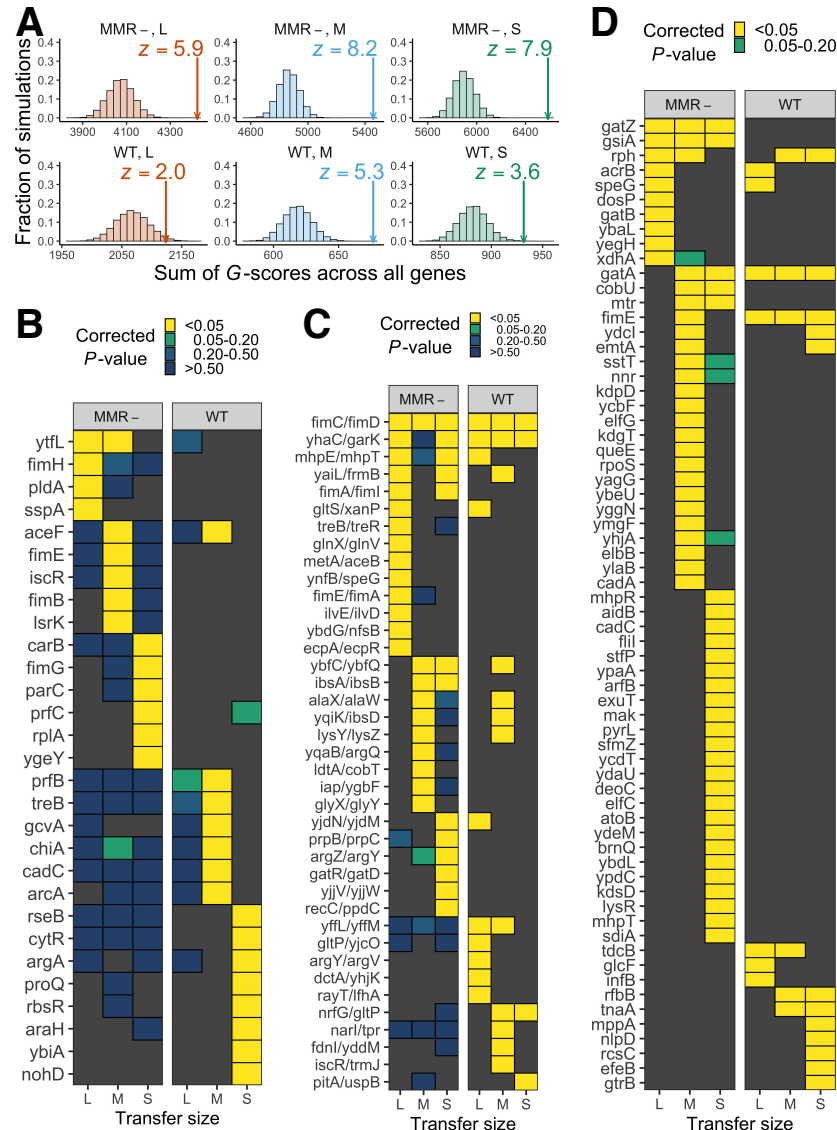

**Figure 5. Evolutionary parallelism as evidence for positive selection.** (A) The arrow and vertical dashed line show the observed sum of *G*-scores, representing the extent of parallel mutation for a particular combination of transfer size and genetic background. The histogram shows the distribution of 20,000 simulated sums of *G*-scores, representing the null distribution of evolutionary parallelism. The significance of the observed sums can be evaluated by *z*-scores ( $z > 1.65$  for one-tailed  $P < 0.05$ ). (B) List of genes with fixed nonsynonymous mutations. Significance levels (simulated *P*-values with Bonferroni correction) are shown by the different non-black colours of tiles. Genes with no such hits in a particular combination are shown by black tiles. (C) List of genes with fixed intergenic mutations. Significance levels (simulated *P*-values with Bonferroni correction) are shown by the different non-black colours of tiles. Intergenic regions with no such hits in a particular combination are shown by black tiles. (D) List of genes significantly overrepresented for structural mutations that are likely under positive selection. Yellow tiles highlight genes observed in at least two populations and yielding simulated *P*-values  $< 0.05$  after Bonferroni correction.

## References

- Abraham JM, Freitag CS, Clements JR, Eisenstein BI. 1985. An invertible element of DNA controls phase variation of type 1 fimbriae of *Escherichia coli*. *Proc Natl Acad Sci U S A* 82: 5724-5727.
- Arjan JA, Visser M, Zeyl CW, Gerrish PJ, Blanchard JL, Lenski RE. 1999. Diminishing returns from mutation supply rate in asexual populations. *Science* 283: 404-406.
- Avalos Vizcarra I, Hosseini V, Kollmannsberger P, Meier S, Weber SS, Arnoldini M, Ackermann M, Vogel V. 2016. How type 1 fimbriae help *Escherichia coli* to evade extracellular antibiotics. *Sci Rep* 6: 18109.
- Barrick JE, Yu DS, Yoon SH, Jeong H, Oh TK, Schneider D, Lenski RE, Kim JF. 2009. Genome evolution and adaptation in a long-term experiment with *Escherichia coli*. *Nature* 461: 1243-1247.
- Barroso-Batista J, Sousa A, Lourenco M, Bergman ML, Sobral D, Demengeot J, Xavier KB, Gordo I. 2014. The first steps of adaptation of *Escherichia coli* to the gut are dominated by soft sweeps. *PLoS Genet* 10: e1004182.
- Baym M, Kryazhimskiy S, Lieberman TD, Chung H, Desai MM, Kishony R. 2015. Inexpensive multiplexed library preparation for megabase-sized genomes. *PLoS One* 10: e0128036.
- Behringer MG, Choi BI, Miller SF, Doak TG, Karty JA, Guo W, Lynch M. 2018. *Escherichia coli* cultures maintain stable subpopulation structure during long-term evolution. *Proc Natl Acad Sci U S A* 115: E4642-E4650.
- Behringer MG, Ho W-C, Miller SF, Meraz JC, Boyer GF, Lynch M. 2020. Evolutionary response to resource deprivation: parallelism and nonmonotonicity. *bioRxiv*: 865584.

- Bell AW, Buckel SD, Groarke JM, Hope JN, Kingsley DH, Hermodson MA. 1986. The nucleotide sequences of the rbsD, rbsA, and rbsC genes of *Escherichia coli* K12. *J Biol Chem* 261: 7652-7658.
- Bollback JP, Huelsenbeck JP. 2007. Clonal interference is alleviated by high mutation rates in large populations. *Mol Biol Evol* 24: 1397-1406.
- Campos PR, Wahl LM. 2010. The adaptation rate of asexuals: deleterious mutations, clonal interference and population bottlenecks. *Evolution* 64: 1973-1983.
- Couce A, Alonso-Rodriguez N, Costas C, Oliver A, Blazquez J. 2016. Intrapopulation variability in mutator prevalence among urinary tract infection isolates of *Escherichia coli*. *Clin Microbiol Infect* 22: 566 e561-567.
- Couce A, Caudwell LV, Feinauer C, Hindre T, Feugeas JP, Weigt M, Lenski RE, Schneider D, Tenailon O. 2017. Mutator genomes decay, despite sustained fitness gains, in a long-term experiment with bacteria. *Proc Natl Acad Sci U S A* 114: E9026-E9035.
- Crow JF, Kimura M. 1965. Evolution in sexual and asexual populations. *The American Naturalist* 99: 439-450.
- Deathage DE, Barrick JE. 2014. Identification of mutations in laboratory-evolved microbes from next-generation sequencing data using breseq. *Methods Mol Biol* 1151: 165-188.
- Desai MM, Fisher DS. 2007. Beneficial mutation selection balance and the effect of linkage on positive selection. *Genetics* 176: 1759-1798.
- Desai MM, Fisher DS, Murray AW. 2007. The speed of evolution and maintenance of variation in asexual populations. *Curr Biol* 17: 385-394.
- Domka J, Lee J, Bansal T, Wood TK. 2007. Temporal gene-expression in *Escherichia coli* K-12 biofilms. *Environ Microbiol* 9: 332-346.



- Foster PL. 2006. Methods for determining spontaneous mutation rates. *Methods Enzymol* 409: 195-213.
- Gerrish PJ, Lenski RE. 1998. The fate of competing beneficial mutations in an asexual population. *Genetica* 102-103: 127-144.
- Gillespie JH. 2000. Genetic drift in an infinite population. The pseudohitchhiking model. *Genetics* 155: 909-919.
- Giraud A, Matic I, Tenaillon O, Clara A, Radman M, Fons M, Taddei F. 2001. Costs and benefits of high mutation rates: adaptive evolution of bacteria in the mouse gut. *Science* 291: 2606-2608.
- Good BH, Rouzine IM, Balick DJ, Hallatschek O, Desai MM. 2012. Distribution of fixed beneficial mutations and the rate of adaptation in asexual populations. *Proc Natl Acad Sci U S A* 109: 4950-4955.
- Good BH, McDonald MJ, Barrick JE, Lenski RE, Desai MM. 2017. The dynamics of molecular evolution over 60,000 generations. *Nature* 551: 45-50.
- Guo Y, Vucelja M, Amir A. 2019. Stochastic tunneling across fitness valleys can give rise to a logarithmic long-term fitness trajectory. *Sci Adv* 5: eaav3842.
- Handel A, Rozen DE. 2009. The impact of population size on the evolution of asexual microbes on smooth versus rugged fitness landscapes. *BMC Evol Biol* 9: 236.
- Iuchi S, Cameron DC, Lin EC. 1989. A second global regulator gene (*arcB*) mediating repression of enzymes in aerobic pathways of *Escherichia coli*. *J Bacteriol* 171: 868-873.
- Kaper JB, Nataro JP, Mobley HL. 2004. Pathogenic *Escherichia coli*. *Nat Rev Microbiol* 2: 123-140.

- Kim Y, Orr HA. 2005. Adaptation in sexuals vs. asexuals: clonal interference and the Fisher-Muller model. *Genetics* 171: 1377-1386.
- Kimura M. 1967. On the evolutionary adjustment of spontaneous mutation rates. *Genetical Research* 9: 23-34.
- Kosheleva K, Desai MM. 2013. The dynamics of genetic draft in rapidly adapting populations. *Genetics* 195: 1007-1025.
- Kristensen HH, Valentin-Hansen P, Sogaard-Andersen L. 1996. CytR/cAMP-CRP nucleoprotein formation in *E. coli*: the CytR repressor binds its operator as a stable dimer in a ternary complex with cAMP-CRP. *J Mol Biol* 260: 113-119.
- Lange R, Hengge-Aronis R. 1991. Identification of a central regulator of stationary-phase gene expression in *Escherichia coli*. *Mol Microbiol* 5: 49-59.
- Le Trong I, Aprikian P, Kidd BA, Forero-Shelton M, Tchesnokova V, Rajagopal P, Rodriguez V, Interlandi G, Klevit R, Vogel V, Stenkamp RE, Sokurenko EV, Thomas WE. 2010. Structural basis for mechanical force regulation of the adhesin FimH via finger trap-like beta sheet twisting. *Cell* 141: 645-655.
- Lee H, Popodi E, Tang H, Foster PL. 2012. Rate and molecular spectrum of spontaneous mutations in the bacterium *Escherichia coli* as determined by whole-genome sequencing. *Proc Natl Acad Sci U S A* 109: E2774-2783.
- Lenski RE, Rose MR, Simpson SC, Tadler SC. 1991. Long-Term experimental evolution in *Escherichia coli*. I. adaptation and divergence during 2,000 generations. *The American Naturalist* 138: 1315-1341.

Li J, Attila C, Wang L, Wood TK, Valdes JJ, Bentley WE. 2007. Quorum sensing in *Escherichia coli* is signaled by AI-2/LsrR: effects on small RNA and biofilm architecture. *J Bacteriol* 189: 6011-6020.

Long H, Miller SF, Strauss C, Zhao C, Cheng L, Ye Z, Griffin K, Te R, Lee H, Chen CC, Lynch M. 2016. Antibiotic treatment enhances the genome-wide mutation rate of target cells. *Proc Natl Acad Sci U S A* 113: E2498-E2505.

Lynch M. 2008. The cellular, developmental and population-genetic determinants of mutation-rate evolution. *Genetics* 180: 933-943.

Lynch M. 2010a. Scaling expectations for the time to establishment of complex adaptations. *Proc Natl Acad Sci U S A* 107: 16577-16582.

Lynch M. 2010b. Evolution of the mutation rate. *Trends Genet* 26: 345-352.

Lynch M, Ackerman MS, Gout JF, Long H, Sung W, Thomas WK, Foster PL. 2016. Genetic drift, selection and the evolution of the mutation rate. *Nat Rev Genet* 17: 704-714.

Lynch M, Ho W-C. 2020. The limits to estimating population-genetic parameters with temporal data. *Genome Biol Evol* 12: 443-455.

Martin M. 2011. Cutadapt removes adapter sequences from high-throughput sequencing reads. *EMBnet.journal* 17: 10-12.

Mauzy CA, Hermodson MA. 1992. Structural homology between rbs repressor and ribose binding protein implies functional similarity. *Protein Sci* 1: 843-849.

McCloskey D, Xu S, Sandberg TE, Brunk E, Hefner Y, Szubin R, Feist AM, Palsson BO. 2018. Evolution of gene knockout strains of *E. coli* reveal regulatory architectures governed by metabolism. *Nat Commun* 9: 3796.

- McDonald JH, Kreitman M. 1991. Adaptive protein evolution at the Adh locus in *Drosophila*. *Nature* 351: 652-654.
- McDonald MJ, Hsieh YY, Yu YH, Chang SL, Leu JY. 2012. The evolution of low mutation rates in experimental mutator populations of *Saccharomyces cerevisiae*. *Curr Biol* 22: 1235-1240.
- McDonald MJ. 2019. Microbial experimental evolution - a proving ground for evolutionary theory and a tool for discovery. *EMBO Rep* 20: e46992.
- Mehta HH, Prater AG, Beabout K, Elworth RAL, Karavis M, Gibbons HS, Shamoo Y. 2019. The essential role of hypermutation in rapid adaptation to antibiotic stress. *Antimicrob Agents Chemother* 63.
- Missiakas D, Mayer MP, Lemaire M, Georgopoulos C, Raina S. 1997. Modulation of the *Escherichia coli* sigmaE (RpoE) heat-shock transcription-factor activity by the RseA, RseB and RseC proteins. *Mol Microbiol* 24: 355-371.
- Monod J. 1949. The growth of bacterial cultures. *Annual Review of Microbiology* 3: 371-394.
- Muller HJ. 1932. Some genetic aspects of sex. *The American Naturalist* 66: 118-138.
- Muller HJ. 1950. Our load of mutations. *Am J Hum Genet* 2: 111-176.
- Navarro Llorens JM, Tormo A, Martinez-Garcia E. 2010. Stationary phase in gram-negative bacteria. *FEMS Microbiol Rev* 34: 476-495.
- Naves P, del Prado G, Huelves L, Gracia M, Ruiz V, Blanco J, Dahbi G, Blanco M, Ponte Mdel C, Soriano F. 2008. Correlation between virulence factors and in vitro biofilm formation by *Escherichia coli* strains. *Microb Pathog* 45: 86-91.
- Neher RA. 2013. Genetic draft, selective interference, and population genetics of rapid adaptation. *Annu Rev Ecol Evol Syst* 44: 195-215.

- Ochs IE, Desai MM. 2015. The competition between simple and complex evolutionary trajectories in asexual populations. *BMC Evol Biol* 15: 55.
- Olsen PB, Schembri MA, Gally DL, Klemm P. 1998. Differential temperature modulation by H-NS of the *fimB* and *fimE* recombinase genes which control the orientation of the type 1 fimbrial phase switch. *FEMS Microbiol Lett* 162: 17-23.
- Park SC, Krug J. 2007. Clonal interference in large populations. *Proc Natl Acad Sci U S A* 104: 18135-18140.
- Park SC, Simon D, Krug J. 2010. The speed of evolution in large asexual populations. *Journal of Statistical Physics* 138: 381-410.
- Penisson S, Singh T, Sniegowski P, Gerrish P. 2017. Dynamics and fate of beneficial mutations under lineage contamination by linked deleterious mutations. *Genetics* 205: 1305-1318.
- Pletnev P, Osterman I, Sergiev P, Bogdanov A, Dontsova O. 2015. Survival guide: *Escherichia coli* in the stationary phase. *Acta Naturae* 7: 22-33.
- Pratt LA, Kolter R. 1998. Genetic analysis of *Escherichia coli* biofilm formation: roles of flagella, motility, chemotaxis and type I pili. *Mol Microbiol* 30: 285-293.
- Rand DM, Kann LM. 1996. Excess amino acid polymorphism in mitochondrial DNA: contrasts among genes from *Drosophila*, mice, and humans. *Mol Biol Evol* 13: 735-748.
- Raynes Y, Halstead AL, Sniegowski PD. 2014. The effect of population bottlenecks on mutation rate evolution in asexual populations. *J Evol Biol* 27: 161-169.
- Rolfe MD, Ter Beek A, Graham AI, Trotter EW, Asif HM, Sanguinetti G, de Mattos JT, Poole RK, Green J. 2011. Transcript profiling and inference of *Escherichia coli* K-12 ArcA activity across the range of physiologically relevant oxygen concentrations. *J Biol Chem* 286: 10147-10154.

- Rossi E, Cimmins A, Luthje P, Brauner A, Sjolting A, Landini P, Romling U. 2018. "It's a gut feeling" - *Escherichia coli* biofilm formation in the gastrointestinal tract environment. *Crit Rev Microbiol* 44: 1-30.
- Schembri MA, Kjaergaard K, Sokurenko EV, Klemm P. 2001. Molecular characterization of the *Escherichia coli* FimH adhesin. *J Infect Dis* 183 Suppl 1: S28-31.
- Schiffels S, Szollosi GJ, Mustonen V, Lassig M. 2011. Emergent neutrality in adaptive asexual evolution. *Genetics* 189: 1361-1375.
- Sezonov G, Joseleau-Petit D, D'Ari R. 2007. *Escherichia coli* physiology in Luria-Bertani broth. *J Bacteriol* 189: 8746-8749.
- Sharma G, Sharma S, Sharma P, Chandola D, Dang S, Gupta S, Gabrani R. 2016. *Escherichia coli* biofilm: development and therapeutic strategies. *J Appl Microbiol* 121: 309-319.
- Sheidy DT, Zielke RA. 2013. Analysis and expansion of the role of the *Escherichia coli* protein ProQ. *PLoS One* 8: e79656.
- Shewaramani S, Finn TJ, Leahy SC, Kassen R, Rainey PB, Moon CD. 2017. Anaerobically grown *Escherichia coli* has an enhanced mutation rate and distinct mutational spectra. *PLoS Genet* 13: e1006570.
- Sniegowski PD, Gerrish PJ, Lenski RE. 1997. Evolution of high mutation rates in experimental populations of *E. coli*. *Nature* 387: 703-705.
- Spears PA, Schauer D, Orndorff PE. 1986. Metastable regulation of type 1 piliation in *Escherichia coli* and isolation and characterization of a phenotypically stable mutant. *J Bacteriol* 168: 179-185.
- Sprouffs K, Aguilar-Rodriguez J, Sniegowski P, Wagner A. 2018. High mutation rates limit evolutionary adaptation in *Escherichia coli*. *PLoS Genet* 14: e1007324.

- Sung W, Ackerman MS, Miller SF, Doak TG, Lynch M. 2012. Drift-barrier hypothesis and mutation-rate evolution. *Proc Natl Acad Sci U S A* 109: 18488-18492.
- Swings T, Van den Bergh B, Wuyts S, Oeyen E, Voordeckers K, Verstrepen KJ, Fauvart M, Verstraeten N, Michiels J. 2017. Adaptive tuning of mutation rates allows fast response to lethal stress in *Escherichia coli*. *Elife* 6.
- Tachida H. 2000. DNA evolution under weak selection. *Gene* 261: 3-9.
- Tarnita CE. 2017. The ecology and evolution of social behavior in microbes. *J Exp Biol* 220: 18-24.
- Tenaillon O, Toupance B, Le Nagard H, Taddei F, Godelle B. 1999. Mutators, population size, adaptive landscape and the adaptation of asexual populations of bacteria. *Genetics* 152: 485-493.
- Tenaillon O, Taddei F, Radmian M, Matic I. 2001. Second-order selection in bacterial evolution: selection acting on mutation and recombination rates in the course of adaptation. *Res Microbiol* 152: 11-16.
- Tenaillon O, Barrick JE, Ribeck N, Deatherage DE, Blanchard JL, Dasgupta A, Wu GC, Wielgoss S, Cruveiller S, Medigue C, Schneider D, Lenski RE. 2016. Tempo and mode of genome evolution in a 50,000-generation experiment. *Nature* 536: 165-170.
- Turner CB, Marshall CW, Cooper VS. 2018. Parallel genetic adaptation across environments differing in mode of growth or resource availability. *Evol Lett* 2: 355-367.
- Van den Bergh B, Swings T, Fauvart M, Michiels J. 2018. Experimental design, population dynamics, and diversity in microbial experimental evolution. *Microbiol Mol Biol Rev* 82.
- Veschetti L, Sandri A, Johansen HK, Lleo MM, Malerba G. 2020. Hypermutation as an evolutionary mechanism for *Achromobacter xylosoxidans* in cystic fibrosis lung Infection. *Pathogens* 9.

- Vogwill T, Phillips RL, Gifford DR, MacLean RC. 2016. Divergent evolution peaks under intermediate population bottlenecks during bacterial experimental evolution. *Proc Biol Sci* 283.
- Waksman G, Hultgren SJ. 2009. Structural biology of the chaperone-usher pathway of pilus biogenesis. *Nat Rev Microbiol* 7: 765-774.
- Watson N, Duniak DS, Rosey EL, Slonczewski JL, Olson ER. 1992. Identification of elements involved in transcriptional regulation of the *Escherichia coli* cad operon by external pH. *J Bacteriol* 174: 530-540.
- Wein T, Dagan T. 2019. The effect of population bottleneck size and selective regime on genetic diversity and evolvability in bacteria. *Genome Biol Evol* 11: 3283-3290.
- Wielgoss S, Barrick JE, Tenaillon O, Wisner MJ, Dittmar WJ, Cruveiller S, Chane-Woon-Ming B, Medigue C, Lenski RE, Schneider D. 2013. Mutation rate dynamics in a bacterial population reflect tension between adaptation and genetic load. *Proc Natl Acad Sci U S A* 110: 222-227.
- Wilke CO. 2004. The speed of adaptation in large asexual populations. *Genetics* 167: 2045-2053.
- Williams AB, Foster PL. 2012. Stress-Induced Mutagenesis. *EcoSal Plus* 5.
- Williams MD, Ouyang TX, Flickinger MC. 1994. Starvation-induced expression of SspA and SspB: the effects of a null mutation in sspA on *Escherichia coli* protein synthesis and survival during growth and prolonged starvation. *Mol Microbiol* 11: 1029-1043.
- Yu GC, Wang LG, Yan GR, He QY. 2015. DOSE: an R/Bioconductor package for disease ontology semantic and enrichment analysis. *Bioinformatics* 31: 608-609.
- Zheng Q. 2017. rSalvador: An R package for the fluctuation experiment. *G3-Genes Genom Genet* 7: 3849-3856.
